# Supplementary material
Source: publisher figshare collection journal article supplement (https://frontiersin.figshare.com/ndownloader/files/28321611)
Supplement: Supplementary file 1 [file 28321611]

## Sheet: Foglio1
MALTESE ISLANDS	Studied site	Latitude	Longitude	Depth	Sample type	Collection date	Remarks
	1. Wied iz-Zurrieq (Malta)	35°49'10.3"N	14°27'04.7"E	23 m	Coarse grained sediment	29-Oct-2017
	2. Ghar Lapsi (Malta)	35°49'35.2"N	14°25'27.6"E	12,5 m	Coarse grained sediment	26-Oct-2017
	3. Cirkewwa (Malta)	35°59'12.1"N	14°19'36.0"E	16 m	Coarse grained sediment	27-Oct-2017
	4. Comino	36°00'32.9"N	14°19'26.8"E	19 m	Fine grained sediment	28-Oct-2017
	5. Cominotto Arch (Comino)	36°00'42.2"N	14°19'06.1"E	15 m	Coarse grained sediment	28-Oct-2017
	6. Comino Channel (Comino)	36°01'13.9"N	14°19'25.4"E	15,7 m	Coarse grained sediment	14-Nov-2017
	7. Anchor Bay - Outer (Malta)	35°57'32.7"N	14°20'19.6"E	11 m	Coarse grained sediment	08-Nov-2017	% of reworked species calculated
	8. Manoel Island	35°54'02.6"N	14°30'18.5"E	15,5 m	Coarse grained sediment	13-Nov-2017	% of reworked species calculated
	9. St. Paul's Bay (Malta)	35°56'59.6"N	14°24'16.7"E	6,6 m	Fine grained sediment	15-Nov-2017	% of reworked species calculated
	10. Balluta Bay (Malta)	35°54'57.0"N	14°29'39.8"E	5 m	Fine grained sediment	23-Nov-2017	% of reworked species calculated
	11. Fond Ghadir (Sliema - Malta)	35°54'56.7"N	14°30'17.8"E	1 m	Coarse grained sediment collected from depression in rocky substratum	05-Dec-2017	% of reworked species calculated
	12. Anchor Bay - Inner (Malta)	35°57'36.0"N	14°20'25.8"E	1,5 m	Coarse grained sediment collected from depression in rocky substratum	04-Nov-2017	% of reworked species calculated
	13. Bahar ic-Caghaq (Malta)	35°56'15.3"N	14°27'45.9"E	2 m	Coarse grained sediment collected from depression in rocky substratum	09-Nov-2017
	14. Ghadira (Malta)	35°58'11.8"N	14°21'08.4"E	3,8 m	Fine grained sediment collected via small grab	08-Dec-2017
	15. Dahlet ix-Xmajjar (Malta)	35°59'50.9"N	14°21'56.6"E	4,6 m	Fine grained sediment collected via small grab	08-Dec-2017
	16. Qortin East (Malta)	35°59'18.5"N	14°21'02.5"E	7 m	Fine grained sediment collected via small grab	08-Dec-2017	% of reworked species calculated
	17. Qortin West (Malta)	35°59'18.3"N	14°20'59.3"E	6,5 m	Fine grained sediment collected via small grab	08-Dec-2017	% of reworked species calculated
	18. Qortin North (Malta)	35°59'25.7"N	14°20'54.5"E	13,9 m	Fine grained sediment collected via small grab	08-Dec-2017	% of reworked species calculated
	19. Gnejna - Inner (Malta)	35°55'17.6"N	14°20'35.0"E	3 m	Fine grained sediment collected via small grab	08-Dec-2017	% of reworked species calculated
	20. Gnejna - Outer (Malta)	35°55'22.6"N	14°20'23.3"E	11 m	Fine grained sediment collected via small grab	08-Dec-2017
	21. Ghajn Tuffieha (Malta)	35°55'45.5"N	14°20'18.8"E	13,5 m	Fine grained sediment collected via small grab	08-Dec-2017
	22. Golden Bay (Malta)	35°55'56.9"N	14°20'33.4"E	4,5 m	Fine grained sediment collected via small grab	08-Dec-2017
	23. Mgarr ix-Xini - Inner (Gozo)	36°01'09.9"N	14°16'20.1"E	7 m	Fine grained sediment collected via small grab	08-Dec-2017
	24. Mgarr ix-Xini - Outer (Gozo)	36°01'02.4"N	14°16'21.7"E	15 m	Fine grained sediment collected via small grab	08-Dec-2017
	25. Xlendi - Inner (Gozo)	36°01'48.6"N	14°13'00.7"E	1,7 m	Fine grained sediment collected via small grab	08-Dec-2017
	26. Xlendi - Outer (Gozo)	36°01'46.1"N	14°12'52.6"E	10 m	Coarse grained sediment collected via small grab	08-Dec-2017
	27. Xatt l-Ahmar (Gozo)	36°01'08.7"N	14°17'25.9"E	1,1 m	Coarse grained sediment collected via small grab	08-Dec-2017
	28. Hondoq - Inner (Gozo)	36°01'39.6"N	14°19'22.0"E	5 m	Coarse grained sediment collected via small grab	08-Dec-2017	% of reworked species calculated
	29. Hondoq - Outer (Gozo)	36°01'34.7"N	14°19'24.5"E	13 m	Coarse grained sediment collected via small grab	08-Dec-2017	% of reworked species calculated
	30. Santa Maria - Inner (Comino)	36°00'59.8"N	14°20'13.9"E	1,4 m	Fine grained sediment collected via small grab	08-Dec-2017
	31. Santa Maria - Outer (Comino)	36°01'10.9"N	14°20'12.8"E	6,5 m	Coarse grained sediment collected via small grab	08-Dec-2017
	32. Mgiebah - Inner (Malta)	35°58'05.4"N	14°22'58.6"E	1,4 m	Fine grained sediment collected via small grab	08-Dec-2017
	33. Mgiebah - Outer (Malta)	35°58'11.9"N	14°23'02.9"E	8,5 m	Fine grained sediment collected via small grab	08-Dec-2017
	CORE18. Marsamxett harbour (Malta)	35°54'16.7''N	14°30'27.5''E	16 m	Fine-grained sands with a high content of clay	08-May-2018
	CORE19. Marsamxett harbour (Malta)	35°54'16.7''N	14°30'27.5''E	17 m	Fine-grained sands with a high content of clay	04-Sep-2019
	GL-1. Globigerina Limestone Formation	35°54'41.3"N	14°30'27.4"E	-	Rocky sample of yellow-gray limestones with Globigerina	08-May-2018
	GL-2. Globigerina Limestone Formation	35°54'41.4"N	14°30'27.1"E	-	Rocky sample of yellow-gray limestones with Globigerina	08-May-2018
	GL-3. Globigerina Limestone Formation	35°54'41.5"N	14°30'26.7"E	-	Rocky sample of yellow-gray limestones with Globigerina	08-May-2018
	UC-1. Upper Coralline Limestone Formation (Malta)	35°59'17.6"N	14°20'45.5"E	-	Rocky sample of fossiliferous limestones with coralline algae	09-May-2018
	UC-2. Upper Coralline Limestone Formation (Malta)	35°59'28.6"N	14°21'19.0"E	-	Rocky sample of fossiliferous limestones with coralline algae	09-May-2018
	UC-3. Upper Coralline Limestone Formation (Malta)	35°59'12.7"N	14°20'25.5"E	-	Rocky sample of fossiliferous limestones with coralline algae	09-May-2018
	Hon-A. Lower Coralline Limestone Formation (Gozo)	36°01'41.5"N	14°19'29.0"E	-	Rocky sample of yellow-gray bioclastic limestones	09-May-2018
	Hon-B. Upper Coralline Limestone Formation (Gozo)	36°01'33.2"N	14°19'08.5"E	-	Rocky sample of fossiliferous limestones with coralline algae	09-May-2018
